# Supplementary material for: Determination of Parabens and Phenolic Compounds in Dairy Products through the Use of a Two-Step Continuous SPE System Including an Enhanced Matrix Removal Sorbent in Combination with UHPLC−MS/MS
Source: MDPI journal article supplement (doi:10.3390/foods12152909), 2023-07-31
Supplement: s1 [file s1]

# **Supplementary Material**

## **Determination of Parabens and Phenolic Compounds in Dairy Products through the Use of a Two-Step Continuous SPE System Including an Enhanced Matrix Removal Sorbent in Combination with UHPLC–MS/MS**

**Laura Palacios Colón, Andrés J. Rascón and Evaristo Ballesteros \***

Department of Physical and Analytical Chemistry, E.P.S of Linares, University of Jaén,  
23700 Linares, Jaén, Spain

**Table S1.** Results obtained for precision and recovery studies for the different types of dairy product samples.

|          |                  | RSD (%) /Recovery (%) <sup>a</sup> |            |           |            |           |            |           |            |           |            |           |            |           |            |           |            |
|----------|------------------|------------------------------------|------------|-----------|------------|-----------|------------|-----------|------------|-----------|------------|-----------|------------|-----------|------------|-----------|------------|
|          |                  | Milk                               |            | Yogurt    |            | Custard   |            | Milkshake |            | Cream     |            | Cheese    |            | Butter    |            | Margarine |            |
|          |                  | 500 ng/kg                          | 2000 ng/kg | 500 ng/kg | 2000 ng/kg | 500 ng/kg | 2000 ng/kg | 500 ng/kg | 2000 ng/kg | 500 ng/kg | 2000 ng/kg | 500 ng/kg | 2000 ng/kg | 500 ng/kg | 2000 ng/kg | 500 ng/kg | 2000 ng/kg |
| Parabens | Methylparaben    | 6.10 <sup>a</sup>                  | 5.28       | 5.33      | 10.25      | 6.46      | 7.21       | 7.50      | 8.67       | 8.25      | 9.75       | 7.25      | 9.28       | 6.09      | 7.19       | 6.05      | 7.45       |
|          |                  | 99 ± 10 <sup>a</sup>               | 101 ± 10   | 104 ± 7   | 101 ± 9    | 95 ± 7    | 95 ± 7     | 98 ± 10   | 101 ± 9    | 105 ± 9   | 102 ± 7    | 96 ± 11   | 93 ± 7     | 95 ± 6    | 102 ± 9    | 101 ± 6   | 106 ± 6    |
|          | Ethylparaben     | 9.20                               | 7.16       | 6.30      | 11.40      | 5.39      | 8.08       | 7.86      | 7.27       | 5.85      | 7.98       | 5.69      | 7.35       | 6.44      | 8.91       | 5.52      | 8.51       |
|          |                  | 101 ± 6                            | 99 ± 10    | 91 ± 8    | 103 ± 8    | 105 ± 9   | 98 ± 5     | 103 ± 9   | 92 ± 6     | 91 ± 8    | 103 ± 9    | 101 ± 10  | 96 ± 8     | 101 ± 10  | 97 ± 6     | 101 ± 6   | 103 ± 7    |
|          | Isopropylparaben | 5.28                               | 7.35       | 7.55      | 9.87       | 6.80      | 9.39       | 5.33      | 9.73       | 8.47      | 9.50       | 9.05      | 5.52       | 8.34      | 11.46      | 6.00      | 10.37      |
|          |                  | 103 ± 9                            | 103 ± 10   | 93 ± 6    | 97 ± 7     | 98 ± 10   | 104 ± 8    | 95 ± 7    | 95 ± 7     | 94 ± 6    | 91 ± 9     | 97 ± 6    | 103 ± 9    | 103 ± 9   | 96 ± 9     | 102 ± 8   | 95 ± 9     |
|          | Butylparaben     | 5.36                               | 7.83       | 8.05      | 7.84       | 7.21      | 9.47       | 6.46      | 6.27       | 5.48      | 9.58       | 9.38      | 9.17       | 5.69      | 10.81      | 5.49      | 10.44      |
|          |                  | 98 ± 5                             | 99 ± 9     | 104 ± 8   | 99 ± 10    | 98 ± 5    | 101 ± 6    | 99 ± 9    | 103 ± 9    | 95 ± 6    | 99 ± 9     | 104 ± 8   | 99 ± 9     | 102 ± 7   | 104 ± 8    | 99 ± 6    | 92 ± 7     |
|          | Propylparaben    | 8.01                               | 9.56       | 6.21      | 10.57      | 7.18      | 9.87       | 8.80      | 6.20       | 7.87      | 7.38       | 11.07     | 8.54       | 6.64      | 6.58       | 6.62      | 9.50       |
|          |                  | 104 ± 8                            | 98 ± 10    | 104 ± 8   | 95 ± 6     | 101 ± 8   | 106 ± 6    | 102 ± 9   | 95 ± 6     | 104 ± 9   | 103 ± 9    | 96 ± 9    | 98 ± 5     | 96 ± 6    | 95 ± 6     | 102 ± 9   | 102 ± 7    |
|          | Isobutylparaben  | 8.29                               | 7.30       | 9.66      | 10.22      | 7.37      | 8.42       | 5.77      | 8.81       | 8.48      | 10.14      | 7.10      | 6.54       | 6.49      | 7.26       | 8.59      | 10.60      |
|          |                  | 102 ± 7                            | 96 ± 8     | 94 ± 6    | 99 ± 9     | 104 ± 7   | 101 ± 6    | 97 ± 5    | 98 ± 9     | 99 ± 6    | 99 ± 10    | 104 ± 8   | 101 ± 6    | 101 ± 8   | 103 ± 8    | 99 ± 4    | 103 ± 10   |
|          | Benzylparaben    | 8.19                               | 8.69       | 5.95      | 7.15       | 8.04      | 6.82       | 7.27      | 8.09       | 6.82      | 9.08       | 5.71      | 9.62       | 4.95      | 7.64       | 7.04      | 6.45       |
|          |                  | 99 ± 7                             | 104 ± 7    | 93 ± 6    | 102 ± 6    | 97 ± 6    | 98 ± 7     | 104 ± 9   | 101 ± 6    | 101 ± 9   | 104 ± 8    | 98 ± 10   | 104 ± 8    | 99 ± 10   | 100 ± 6    | 99 ± 8    | 98 ± 7     |

Table S1. Continued

|         | RSD (%) / Recovery (%) <sup>a</sup> |                     |           |            |           |            |           |            |           |            |           |            |           |            |           |            |         |
|---------|-------------------------------------|---------------------|-----------|------------|-----------|------------|-----------|------------|-----------|------------|-----------|------------|-----------|------------|-----------|------------|---------|
|         | Milk                                |                     | Yogurt    |            | Custard   |            | Milkshake |            | Cream     |            | Cheese    |            | Butter    |            | Margarine |            |         |
|         | 500 ng/kg                           | 2000 ng/kg          | 500 ng/kg | 2000 ng/kg | 500 ng/kg | 2000 ng/kg | 500 ng/kg | 2000 ng/kg | 500 ng/kg | 2000 ng/kg | 500 ng/kg | 2000 ng/kg | 500 ng/kg | 2000 ng/kg | 500 ng/kg | 2000 ng/kg |         |
| Phenols | Pentylphenol                        | 6.49 <sup>a</sup>   | 7.95      | 7.20       | 8.77      | 6.55       | 10.40     | 5.69       | 5.78      | 7.29       | 8.16      | 8.57       | 8.52      | 7.83       | 7.88      | 6.66       | 8.30    |
|         |                                     | 98 ± 6 <sup>a</sup> | 99 ± 5    | 104 ± 8    | 97 ± 5    | 101 ± 6    | 99 ± 8    | 99 ± 8     | 97 ± 6    | 94 ± 7     | 104 ± 8   | 105 ± 10   | 98 ± 9    | 95 ± 7     | 100 ± 5   | 99 ± 8     | 105 ± 7 |
|         | 4-Chloro-3-methylphenol             | 5.29                | 9.56      | 5.20       | 5.27      | 10.67      | 4.65      | 9.38       | 9.55      | 6.10       | 10.54     | 8.48       | 5.34      | 10.15      | 6.19      | 9.15       | 6.89    |
|         |                                     | 104 ± 8             | 99 ± 9    | 105 ± 7    | 98 ± 9    | 98 ± 10    | 101 ± 9   | 91 ± 8     | 101 ± 10  | 93 ± 6     | 95 ± 7    | 92 ± 7     | 103 ± 5   | 99 ± 8     | 94 ± 7    | 103 ± 9    | 103 ± 9 |
|         | 4- <i>tert</i> -Octylphenol         | 5.39                | 8.49      | 5.65       | 4.34      | 7.46       | 9.50      | 4.20       | 10.47     | 5.40       | 10.21     | 8.45       | 8.33      | 5.75       | 8.49      | 3.59       | 6.57    |
|         |                                     | 99 ± 9              | 95 ± 8    | 99 ± 8     | 99 ± 8    | 103 ± 5    | 104 ± 8   | 102 ± 7    | 92 ± 6    | 94 ± 6     | 99 ± 9    | 94 ± 7     | 93 ± 6    | 103 ± 9    | 105 ± 9   | 98 ± 8     | 104 ± 9 |
|         | Phenol                              | 8.08                | 8.37      | 5.95       | 7.91      | 9.57       | 10.34     | 6.14       | 8.21      | 7.24       | 11.30     | 6.52       | 7.53      | 3.08       | 6.56      | 8.88       | 3.25    |
|         |                                     | 104 ± 9             | 101 ± 6   | 101 ± 9    | 104 ± 8   | 98 ± 10    | 104 ± 8   | 103 ± 9    | 99 ± 6    | 98 ± 10    | 92 ± 7    | 105 ± 8    | 105 ± 7   | 98 ± 10    | 95 ± 7    | 100 ± 5    | 103 ± 5 |
|         | 4- <i>tert</i> -Butylphenol         | 5.59                | 11.1      | 5.44       | 6.36      | 7.39       | 9.34      | 5.29       | 9.65      | 6.27       | 9.40      | 9.86       | 8.40      | 7.51       | 9.82      | 7.01       | 9.40    |
|         |                                     | 96 ± 6              | 103 ± 6   | 102 ± 7    | 100 ± 8   | 99 ± 8     | 98 ± 5    | 101 ± 6    | 99 ± 9    | 103 ± 9    | 96 ± 9    | 98 ± 8     | 97 ± 9    | 96 ± 9     | 104 ± 8   | 102 ± 9    | 104 ± 8 |
|         | Nonylphenol                         | 7.64                | 10.31     | 5.84       | 9.24      | 6.65       | 7.54      | 5.55       | 9.37      | 5.32       | 9.81      | 10.77      | 9.25      | 5.58       | 10.74     | 6.08       | 7.17    |
|         |                                     | 98 ± 10             | 101 ± 9   | 96 ± 11    | 101 ± 9   | 101 ± 6    | 99 ± 9    | 103 ± 9    | 103 ± 9   | 101 ± 10   | 104 ± 7   | 93 ± 6     | 102 ± 6   | 97 ± 6     | 101 ± 9   | 95 ± 6     | 91 ± 8  |
|         | 2- <i>tert</i> -Butylphenol         | 5.70                | 10.44     | 7.02       | 9.41      | 7.57       | 10.51     | 7.08       | 6.17      | 6.22       | 9.61      | 6.38       | 9.34      | 5.78       | 9.50      | 7.24       | 8.97    |
|         |                                     | 99 ± 8              | 102 ± 6   | 102 ± 7    | 99 ± 9    | 98 ± 10    | 95 ± 7    | 100 ± 5    | 96 ± 9    | 98 ± 5     | 99 ± 9    | 104 ± 8    | 95 ± 6    | 101 ± 8    | 106 ± 6   | 99 ± 9     | 101 ± 9 |
|         | Bisphenol F                         | 5.99                | 9.55      | 6.04       | 8.27      | 9.41       | 8.24      | 5.62       | 8.3       | 5.89       | 7.91      | 6.50       | 6.57      | 6.65       | 6.24      | 5.34       | 11.31   |
|         |                                     | 101 ± 6             | 94 ± 5    | 91 ± 8     | 101 ± 10  | 93 ± 6     | 93 ± 7    | 104 ± 8    | 103 ± 5   | 100 ± 5    | 103 ± 9   | 94 ± 7     | 103 ± 9   | 101 ± 10   | 96 ± 11   | 102 ± 7    | 104 ± 8 |
|         | 3,4-Dimethylphenol                  | 7.00                | 10.64     | 4.29       | 9.61      | 8.25       | 9.35      | 5.77       | 9.58      | 5.56       | 8.36      | 6.52       | 6.40      | 8.28       | 6.49      | 6.24       | 10.81   |
|         |                                     | 100 ± 5             | 101 ± 9   | 95 ± 7     | 98 ± 10   | 97 ± 5     | 104 ± 8   | 97 ± 5     | 101 ± 6   | 93 ± 6     | 104 ± 8   | 98 ± 10    | 98 ± 5    | 99 ± 8     | 105 ± 7   | 103 ± 9    | 103 ± 9 |
|         | 2,5-Dimethylphenol                  | 6.69                | 7.71      | 5.51       | 9.32      | 9.09       | 10.71     | 9.81       | 7.16      | 5.44       | 10.64     | 5.67       | 9.38      | 6.43       | 6.78      | 7.60       | 6.38    |
|         |                                     | 100 ± 8             | 99 ± 8    | 98 ± 5     | 95 ± 7    | 101 ± 6    | 106 ± 6   | 103 ± 9    | 100 ± 8   | 105 ± 7    | 91 ± 6    | 103 ± 6    | 103 ± 9   | 97 ± 8     | 104 ± 8   | 91 ± 9     | 95 ± 6  |
|         | 4-Phenylphenol                      | 5.33                | 10.13     | 6.15       | 9.19      | 11.30      | 8.56      | 8.03       | 7.23      | 6.32       | 10.98     | 6.76       | 5.45      | 5.29       | 7.25      | 5.47       | 8.09    |
|         |                                     | 99 ± 5              | 93 ± 6    | 100 ± 5    | 94 ± 7    | 100 ± 8    | 91 ± 8    | 102 ± 7    | 96 ± 8    | 97 ± 6     | 97 ± 5    | 95 ± 10    | 100 ± 5   | 93 ± 6     | 100 ± 5   | 93 ± 6     | 103 ± 8 |
|         | 2-Phenylphenol                      | 6.32                | 9.25      | 7.25       | 11.30     | 6.17       | 7.26      | 9.03       | 6.24      | 5.25       | 11.01     | 5.68       | 7.55      | 8.98       | 9.41      | 5.55       | 7.56    |
|         |                                     | 96 ± 6              | 93 ± 6    | 102 ± 7    | 104 ± 6   | 101 ± 9    | 104 ± 8   | 98 ± 5     | 103 ± 9   | 99 ± 4     | 101 ± 10  | 100 ± 5    | 93 ± 6    | 100 ± 5    | 91 ± 9    | 101 ± 6    | 104 ± 7 |
|         | Bisphenol S                         | 4.35                | 10.61     | 8.26       | 9.41      | 6.19       | 9.45      | 7.58       | 6.19      | 8.94       | 7.98      | 8.32       | 5.44      | 6.34       | 6.47      | 7.18       | 9.41    |
|         |                                     | 103 ± 9             | 104 ± 8   | 103 ± 9    | 105 ± 8   | 102 ± 8    | 99 ± 8    | 101 ± 10   | 101 ± 9   | 91 ± 9     | 99 ± 9    | 95 ± 8     | 99 ± 8    | 105 ± 9    | 95 ± 8    | 99 ± 8     | 99 ± 8  |
|         | 4-Chlorophenol                      | 6.28                | 10.90     | 5.24       | 10.75     | 6.35       | 9.30      | 7.14       | 6.30      | 5.99       | 6.35      | 7.57       | 9.31      | 5.56       | 7.41      | 6.55       | 8.20    |
|         |                                     | 102 ± 7             | 98 ± 5    | 102 ± 6    | 104 ± 7   | 105 ± 7    | 96 ± 8    | 96 ± 6     | 102 ± 9   | 98 ± 5     | 105 ± 7   | 99 ± 9     | 104 ± 8   | 99 ± 9     | 98 ± 5    | 101 ± 10   | 101 ± 9 |
|         | 4-Hexylphenol                       | 9.09                | 11.09     | 6.46       | 5.28      | 8.33       | 9.41      | 6.08       | 6.39      | 5.31       | 9.35      | 6.15       | 10.41     | 7.74       | 10.61     | 5.35       | 9.08    |
|         |                                     | 103 ± 9             | 102 ± 6   | 98 ± 5     | 99 ± 9    | 91 ± 9     | 94 ± 7    | 105 ± 7    | 98 ± 10   | 105 ± 7    | 99 ± 10   | 95 ± 7     | 100 ± 5   | 100 ± 7    | 93 ± 6    | 100 ± 5    | 94 ± 7  |
|         | Bisphenol A                         | 5.34                | 8.42      | 6.86       | 6.28      | 7.56       | 10.81     | 9.83       | 9.83      | 5.91       | 9.89      | 7.07       | 10.50     | 7.64       | 9.60      | 7.21       | 11.38   |
|         |                                     | 98 ± 8              | 99 ± 8    | 101 ± 10   | 101 ± 9   | 91 ± 9     | 98 ± 5    | 93 ± 7     | 94 ± 7    | 97 ± 7     | 98 ± 5    | 100 ± 5    | 93 ± 6    | 100 ± 5    | 96 ± 6    | 103 ± 6    | 102 ± 7 |
|         | Bisphenol B                         | 6.63                | 7.20      | 5.68       | 5.55      | 10.45      | 8.27      | 6.35       | 8.27      | 5.42       | 9.60      | 6.70       | 9.51      | 5.94       | 8.20      | 6.25       | 9.40    |
|         |                                     | 103 ± 5             | 101 ± 6   | 99 ± 9     | 98 ± 8    | 103 ± 7    | 103 ± 8   | 96 ± 11    | 96 ± 11   | 105 ± 6    | 105 ± 8   | 102 ± 8    | 96 ± 7    | 102 ± 7    | 94 ± 6    | 91 ± 8     | 92 ± 7  |
|         | 4-Heptylphenol                      | 6.35                | 8.47      | 5.39       | 7.22      | 6.98       | 6.61      | 4.68       | 9.35      | 8.91       | 9.30      | 5.25       | 10.34     | 5.84       | 9.37      | 6.80       | 7.44    |
|         |                                     | 101 ± 9             | 91 ± 8    | 103 ± 9    | 99 ± 8    | 104 ± 7    | 93 ± 6    | 100 ± 7    | 105 ± 8   | 98 ± 5     | 105 ± 7   | 91 ± 8     | 101 ± 9   | 106 ± 6    | 98 ± 5    | 96 ± 7     | 95 ± 6  |
|         | Bisphenol Z                         | 6.62                | 9.55      | 6.28       | 8.15      | 7.19       | 8.45      | 5.85       | 6.78      | 6.13       | 7.24      | 7.34       | 9.35      | 9.82       | 8.50      | 5.29       | 11.32   |
|         |                                     | 98 ± 10             | 99 ± 9    | 99 ± 4     | 103 ± 10  | 105 ± 8    | 92 ± 5    | 91 ± 6     | 103 ± 6   | 106 ± 6    | 103 ± 9   | 100 ± 8    | 94 ± 7    | 98 ± 8     | 101 ± 10  | 91 ± 8     | 91 ± 8  |
|         | Pentachlorophenol                   | 8.85                | 7.75      | 7.41       | 6.88      | 8.65       | 6.30      | 10.32      | 8.15      | 7.17       | 7.48      | 7.91       | 11.02     | 5.82       | 8.36      | 6.38       | 10.94   |
|         |                                     | 105 ± 6             | 95 ± 8    | 91 ± 9     | 94 ± 7    | 105 ± 7    | 104 ± 7   | 105 ± 7    | 101 ± 6   | 106 ± 6    | 93 ± 6    | 100 ± 9    | 101 ± 10  | 98 ± 7     | 93 ± 6    | 99 ± 9     | 96 ± 8  |
|         | Triclosan                           | 9.13                | 5.64      | 8.23       | 6.13      | 7.18       | 9.40      | 8.07       | 7.50      | 5.55       | 10.10     | 6.16       | 7.22      | 8.15       | 10.13     | 5.24       | 5.78    |
|         |                                     | 94 ± 7              | 105 ± 7   | 105 ± 7    | 98 ± 10   | 97 ± 8     | 105 ± 6   | 96 ± 9     | 98 ± 6    | 104 ± 9    | 98 ± 8    | 103 ± 9    | 102 ± 6   | 104 ± 8    | 93 ± 7    | 105 ± 8    | 99 ± 8  |

<sup>a</sup> RSD: relative standard deviation (n=12) for 500 and 2000 ng/kg (p< 0.05), interday. Percent recoveries (% ± SD, n = 3) of analytes spiked to milk and dairy product samples (500 – 2 000 ng/L)

**Table S2.** Results obtained in the matrix effect studies of the different types of dairy product samples

|          |                         | Matrix Effect (%) <sup>a</sup> |            |             |             |             |             |             |            |
|----------|-------------------------|--------------------------------|------------|-------------|-------------|-------------|-------------|-------------|------------|
|          |                         | Milk                           | Yoghourt   | Cheese      | Milkshake   | Cream       | Custard     | Butter      | Margarine  |
| Parabens | Methylparaben           | 1.03 (3%)                      | 0.98 (-2%) | 0.94 (-6%)  | 1.06 (6%)   | 0.95 (-5%)  | 0.97 (-3%)  | 1.02 (2%)   | 0.92 (-7%) |
|          | Ethylparaben            | 0.98 (-2%)                     | 1.04 (4%)  | 1.05 (5%)   | 0.93 (-7%)  | 0.99 (-1%)  | 1.03 (3%)   | 0.95 (-5%)  | 0.93 (-7%) |
|          | Isopropylparaben        | 1.07 (7%)                      | 0.98 (-2%) | 0.94 (-6%)  | 1.05 (5%)   | 0.95 (-5%)  | 1.03 (3%)   | 1.05 (5%)   | 0.93 (-7%) |
|          | Butylparaben            | 1.02 (2%)                      | 0.92 (-8%) | 0.99 (-1%)  | 1.01 (1%)   | 0.95 (-5%)  | 0.90 (-10%) | 1.01 (1%)   | 1.02 (2%)  |
|          | Propylparaben           | 1.02 (2%)                      | 0.92 (-7%) | 0.95 (-5%)  | 0.90 (-10%) | 1.06 (6%)   | 0.92 (-8%)  | 0.90 (-10%) | 0.98 (-2%) |
|          | Isobutylparaben         | 0.95 (-5%)                     | 0.93 (-7%) | 0.93 (-7%)  | 1.04 (4%)   | 0.93 (-7%)  | 1.04 (4%)   | 1.04 (4%)   | 0.99 (-1%) |
|          | Benzylparaben           | 0.99 (-1%)                     | 1.05 (5%)  | 1.03 (3%)   | 0.98 (-2%)  | 1.03 (3%)   | 0.98 (-2%)  | 0.99 (-1%)  | 1.05 (5%)  |
| Phenols  | Pentylphenol            | 1.02 (2%)                      | 0.95 (-5%) | 0.90 (-10%) | 0.98 (-2%)  | 1.02 (2%)   | 0.92 (-7%)  | 0.94 (-6%)  | 1.04 (4%)  |
|          | 4-Chloro-3-methylphenol | 1.07 (7%)                      | 1.06 (6%)  | 0.92 (-8%)  | 0.93 (-7%)  | 0.93 (-7%)  | 0.97 (-3%)  | 0.90 (-10%) | 1.04 (4%)  |
|          | 4-tert-Octylphenol      | 0.95 (-5%)                     | 0.93 (-7%) | 0.95 (-5%)  | 0.93 (-7%)  | 1.02 (2%)   | 0.93 (-7%)  | 0.95 (-5%)  | 0.93 (-7%) |
|          | Phenol                  | 0.99 (-1%)                     | 1.03 (3%)  | 0.95 (-5%)  | 1.04 (4%)   | 1.05 (5%)   | 1.06 (6%)   | 1.04 (4%)   | 1.02 (2%)  |
|          | 4-tert-Butylphenol      | 0.95 (-5%)                     | 1.03 (3%)  | 0.90 (-10%) | 0.92 (-7%)  | 0.96 (-4%)  | 0.95 (-5%)  | 0.98 (-2%)  | 0.99 (-1%) |
|          | Nonylphenol             | 0.98 (-2%)                     | 0.93 (-7%) | 0.97 (-3%)  | 0.93 (-7%)  | 0.94 (-6%)  | 1.03 (3%)   | 0.99 (-1%)  | 1.03 (3%)  |
|          | 2-tert-Butylphenol      | 0.98 (-2%)                     | 1.02 (2%)  | 0.93 (-7%)  | 1.02 (2%)   | 0.93 (-7%)  | 0.93 (-7%)  | 0.93 (-7%)  | 1.06 (6%)  |
|          | Bisphenol F             | 0.94 (-6%)                     | 1.03 (3%)  | 0.99 (-1%)  | 1.03 (3%)   | 0.99 (-1%)  | 0.93 (-7%)  | 1.02 (2%)   | 1.10 (10%) |
|          | 3,4-Dimethylphenol      | 0.93 (-7%)                     | 1.06 (6%)  | 1.02 (2%)   | 0.92 (-7%)  | 1.02 (2%)   | 0.93 (-7%)  | 0.92 (-8%)  | 0.92 (-8%) |
|          | 2,5-Dimethylphenol      | 0.98 (-2%)                     | 0.92 (-7%) | 0.93 (-7%)  | 1.04 (4%)   | 0.90 (-10%) | 0.98 (-2%)  | 0.93 (-7%)  | 0.95 (-5%) |
|          | 4-Phenylphenol          | 0.95 (-5%)                     | 1.04 (4%)  | 0.90 (-10%) | 1.04 (4%)   | 1.02 (2%)   | 0.94 (-6%)  | 1.06 (6%)   | 0.95 (-5%) |
|          | 2-Phenylphenol          | 1.01 (1%)                      | 1.04 (4%)  | 0.95 (-5%)  | 0.93 (-7%)  | 0.99 (-1%)  | 1.05 (5%)   | 1.05 (5%)   | 0.93 (-7%) |
|          | Bisphenol S             | 0.99 (-1%)                     | 0.93 (-7%) | 1.05 (5%)   | 1.06 (6%)   | 0.98 (-2%)  | 0.92 (-7%)  | 1.06 (6%)   | 0.93 (-7%) |
|          | 4-Chlorophenol          | 1.04 (4%)                      | 1.02 (2%)  | 0.96 (-4%)  | 0.95 (-5%)  | 0.99 (-1%)  | 1.05 (5%)   | 0.95 (-5%)  | 1.02 (2%)  |
|          | 4-Hexylphenol           | 1.05 (5%)                      | 1.01 (1%)  | 1.06 (6%)   | 0.96 (-6%)  | 0.92 (-8%)  | 1.02 (2%)   | 0.93 (-7%)  | 0.99 (-1%) |
|          | Bisphenol A             | 1.02 (2%)                      | 0.94 (-6%) | 1.04 (4%)   | 1.01 (1%)   | 1.06 (6%)   | 0.98 (-2%)  | 1.08 (8%)   | 0.95 (-5%) |
|          | Bisphenol B             | 0.99 (-1%)                     | 1.05 (5%)  | 0.95 (-5%)  | 0.99 (-1%)  | 0.95 (-5%)  | 0.99 (-1%)  | 1.02 (2%)   | 0.95 (-5%) |
|          | 4-Heptylphenol          | 0.94 (-6%)                     | 1.04 (4%)  | 1.05 (5%)   | 1.04 (4%)   | 0.98 (-2%)  | 1.02 (2%)   | 0.93 (-7%)  | 1.04 (4%)  |
|          | Bisphenol Z             | 0.92 (8%)                      | 1.01 (1%)  | 1.08 (8%)   | 0.92 (-8%)  | 1.08 (8%)   | 1.05 (5%)   | 0.92 (-8%)  | 0.93 (-7%) |
|          | Pentachlorophenol       | 0.90 (-10%)                    | 1.02 (2%)  | 1.08 (8%)   | 1.02 (2%)   | 0.91 (-9%)  | 0.98 (-2%)  | 0.92 (-7%)  | 0.95 (-5%) |
|          | Triclosan               | 1.02 (2%)                      | 1.06 (6%)  | 0.91 (-9%)  | 1.06 (6%)   | 1.01 (1%)   | 0.93 (-7%)  | 1.06 (6%)   | 1.06 (6%)  |

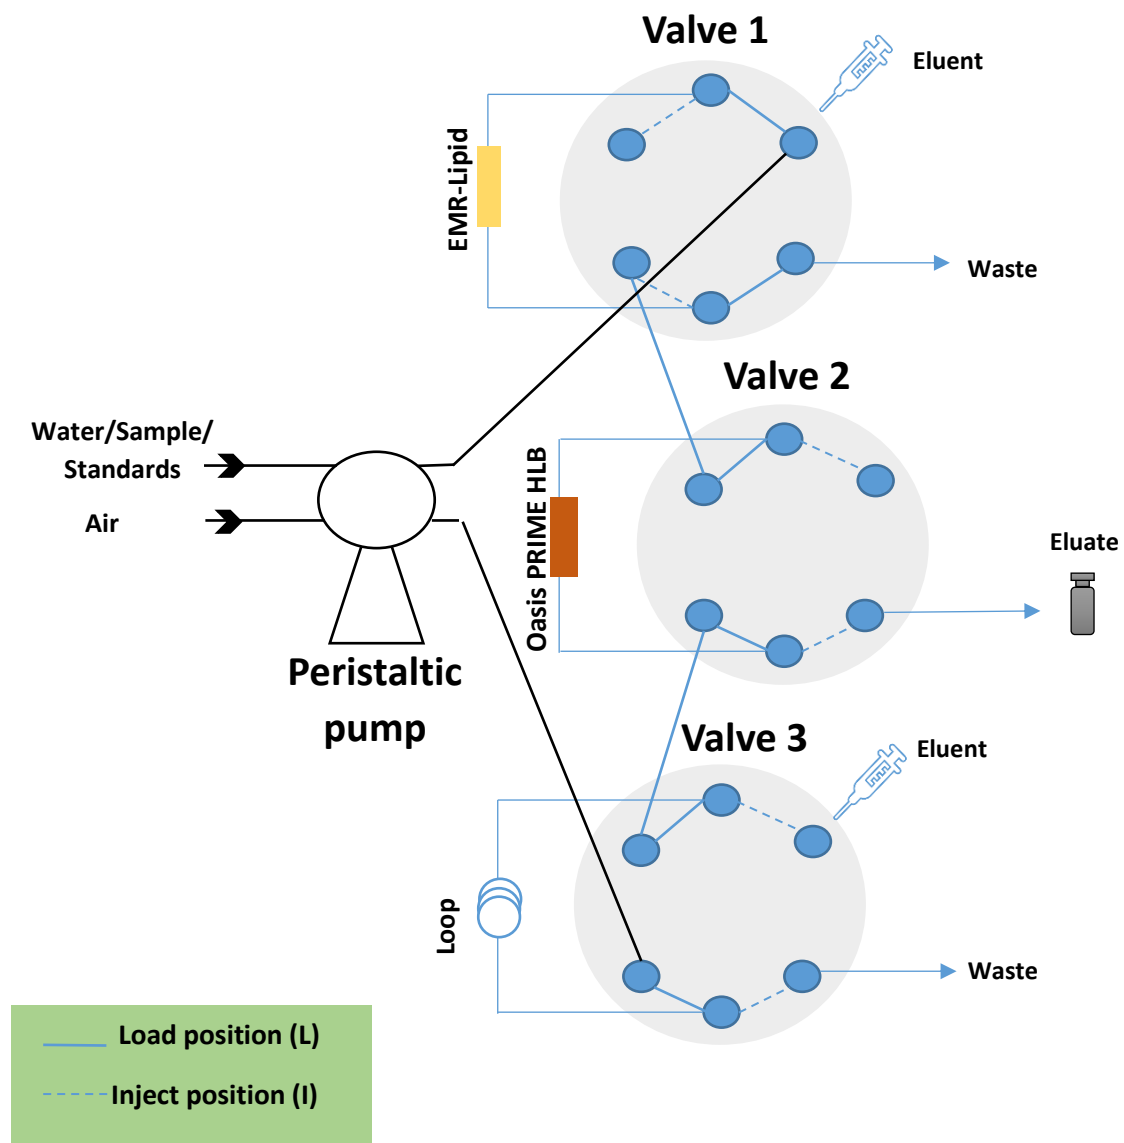

| Step                                    | Valve 1 | Valve 2 | Valve 3 |
|-----------------------------------------|---------|---------|---------|
| 1. ERM-Lipid sorbent conditioning       | L       | I       | I       |
| 2. Oasis PRiME HLB sorbent conditioning | I       | L       | I       |
| 3. Introduction of sample or standards  | L       | L       | L       |
| 4. Oasis PRiME HLB drying               | L       | I       | L       |
| 5. Elution of analytes                  | L       | I       | I       |

Figure S1. Continuous-flow system for the solid-phase with three injection valves and two serially columns.

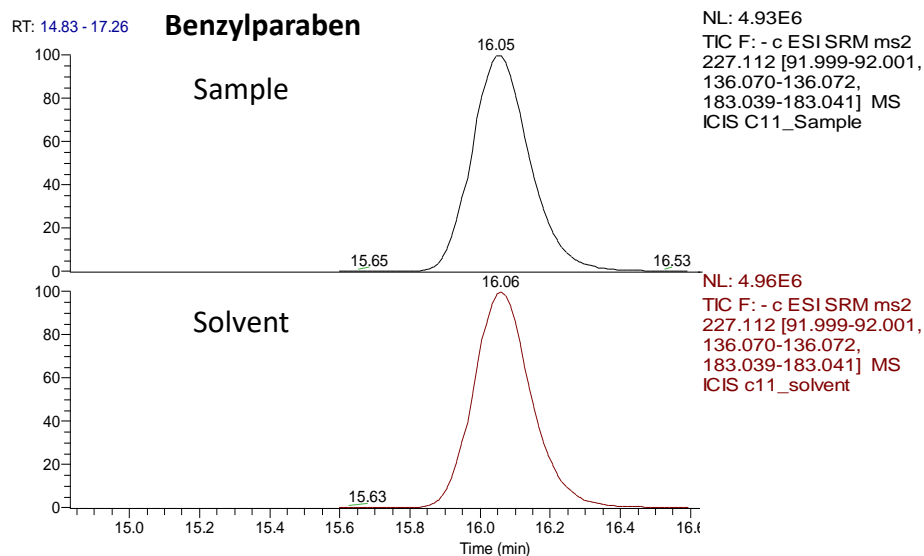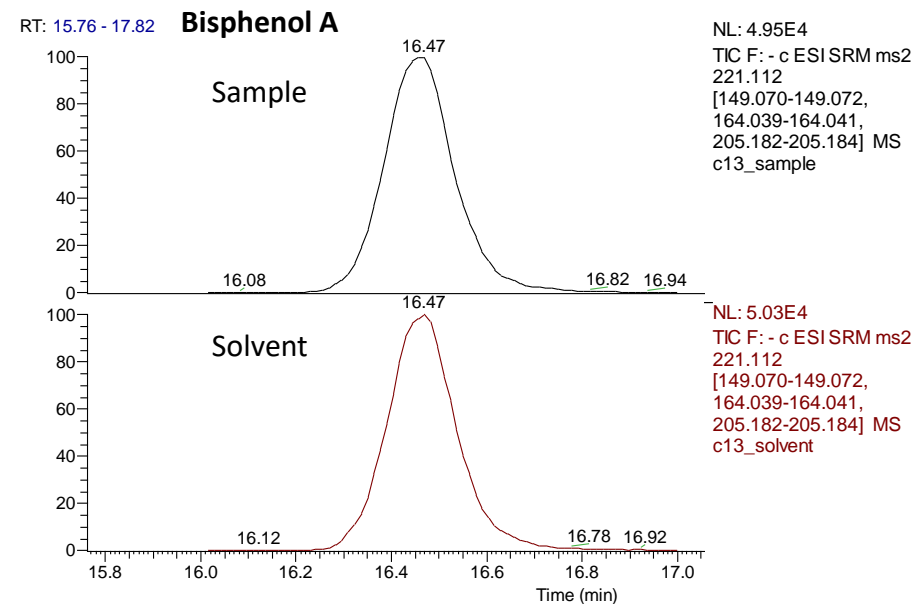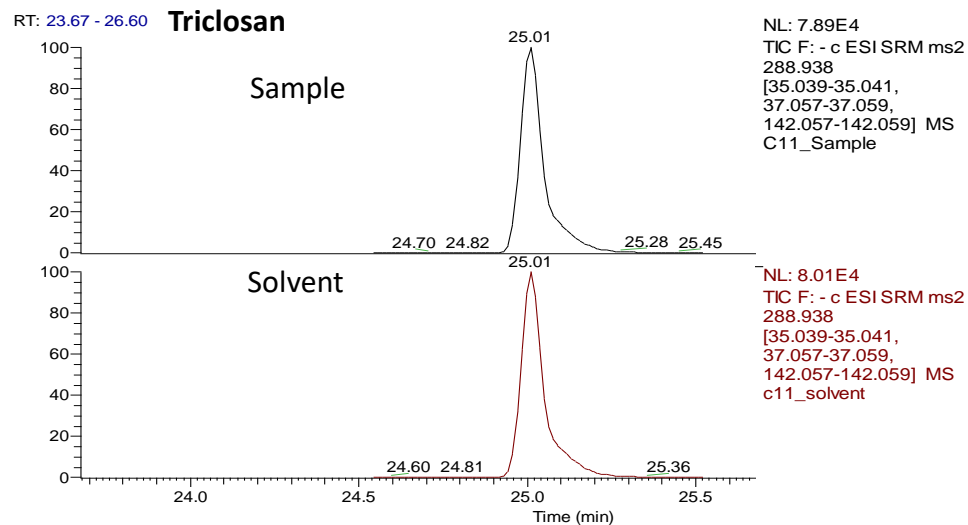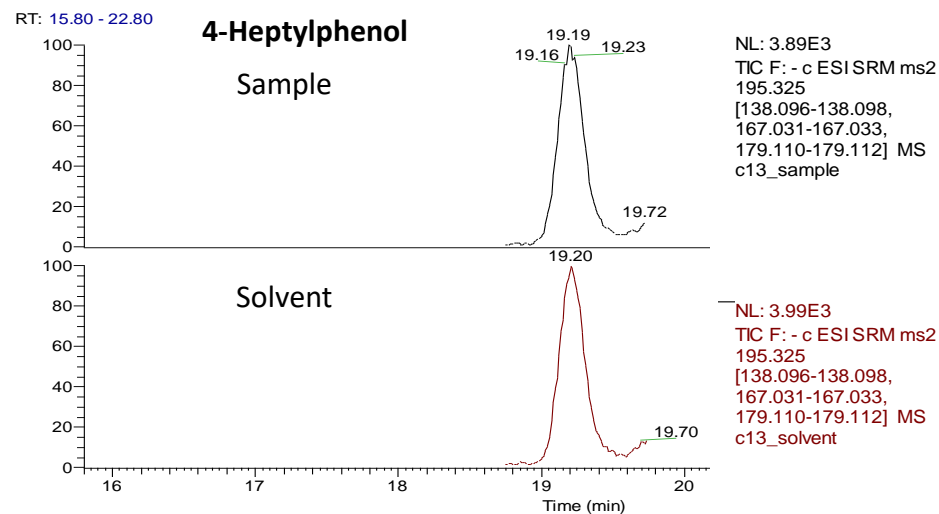

Figure S2. Extract ion chromatograms for four analytes (benzylparaben, bisphenol A, triclosan and 4-heptylphenol). In one chromatogram, the analyte is spiked in the solvent, and in the other the analyte is spiked in a milk sample.
